# Supplementary material for: Glycopolypeptide conformations in bioactive block copolymer assemblies influence their nanoscale morphology
Source: Royal Society of Chemistry journal article supplement (doi:10.1039/c3sm27559k), 2013-01-01

## Supporting Information

### Glycopolypeptide conformations in bioactive block copolymer assemblies influence their nanoscale morphology

Jessica R. Kramer, April R. Rodriguez, Uh-Joo Choe, Daniel T. Kamei, and Timothy J. Deming\*

#### Spectral Data

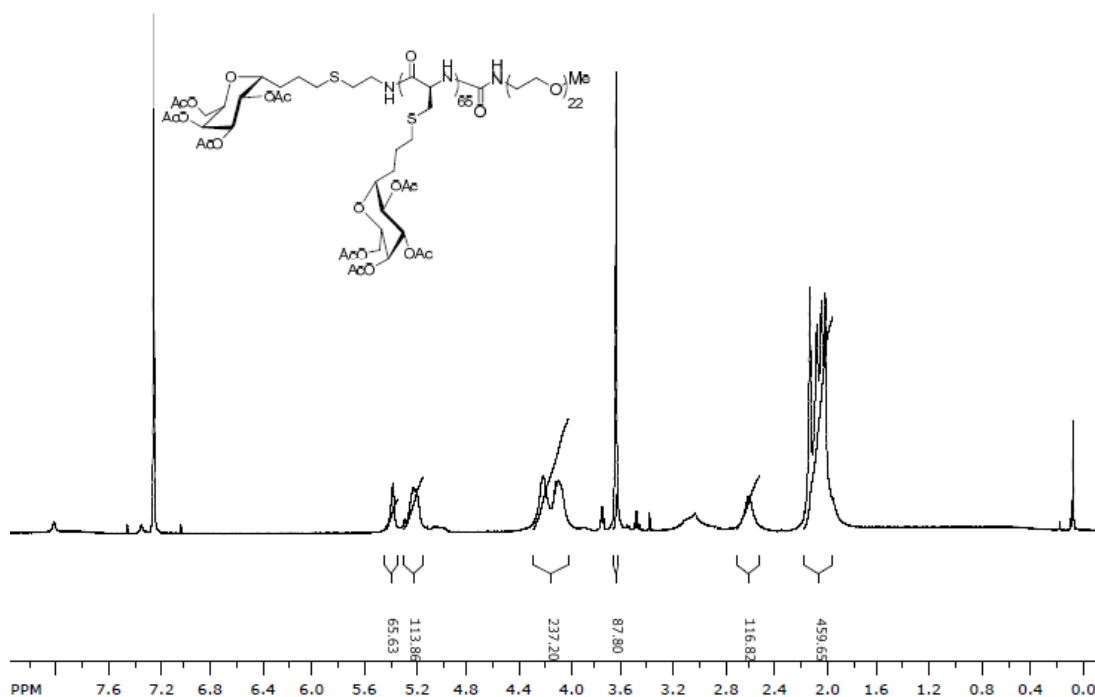

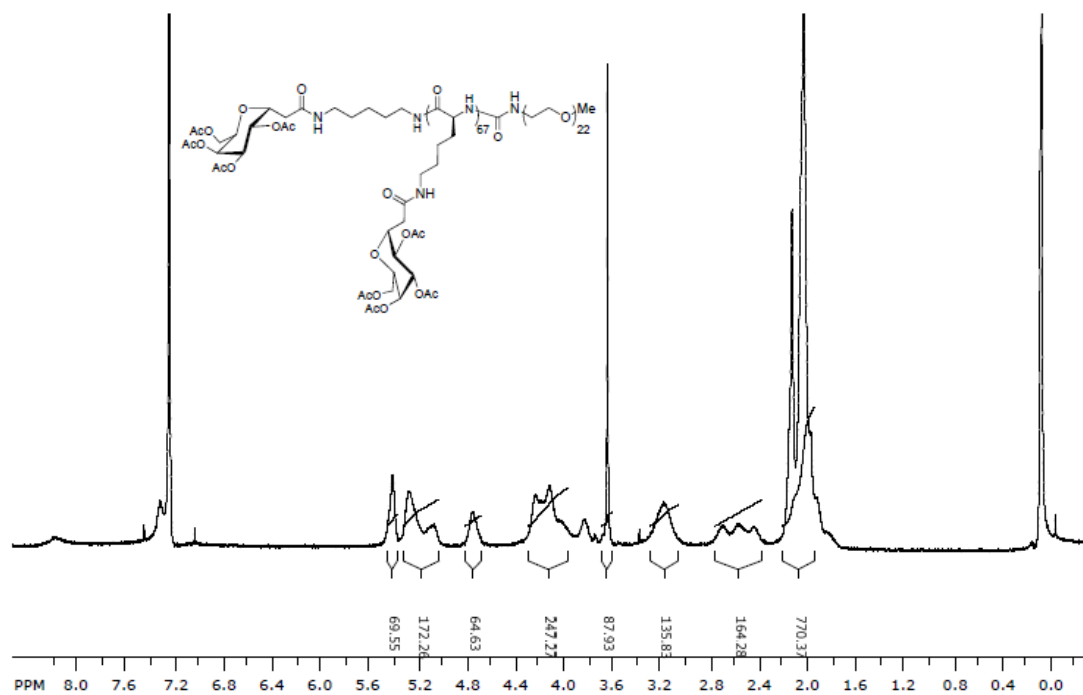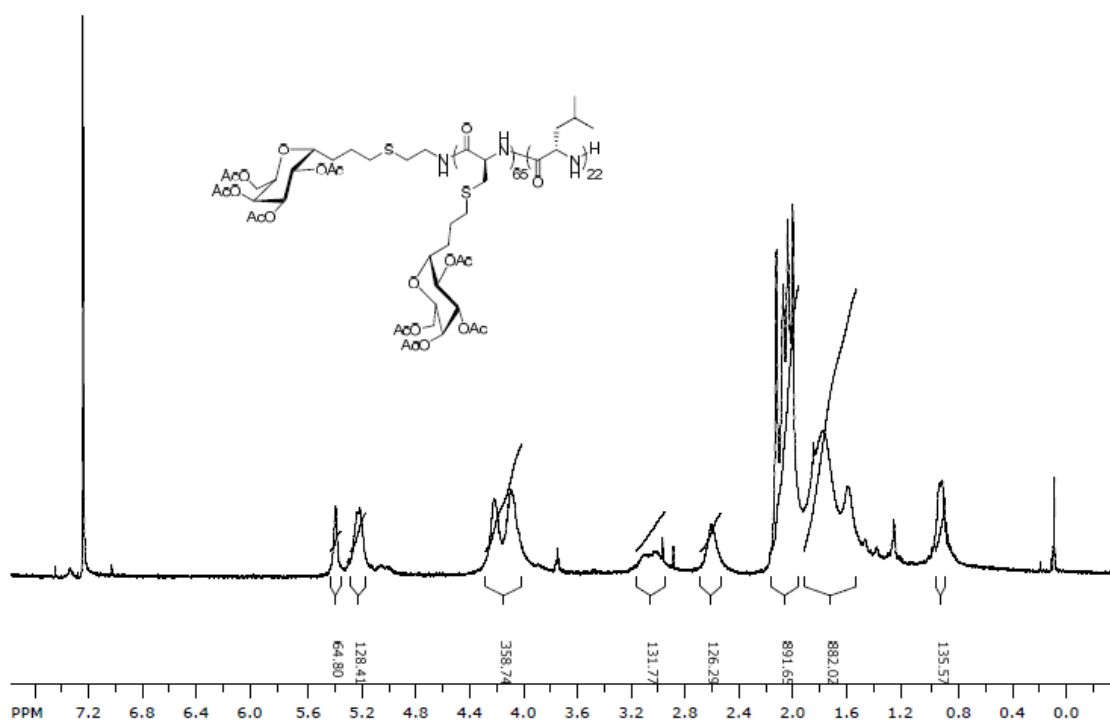

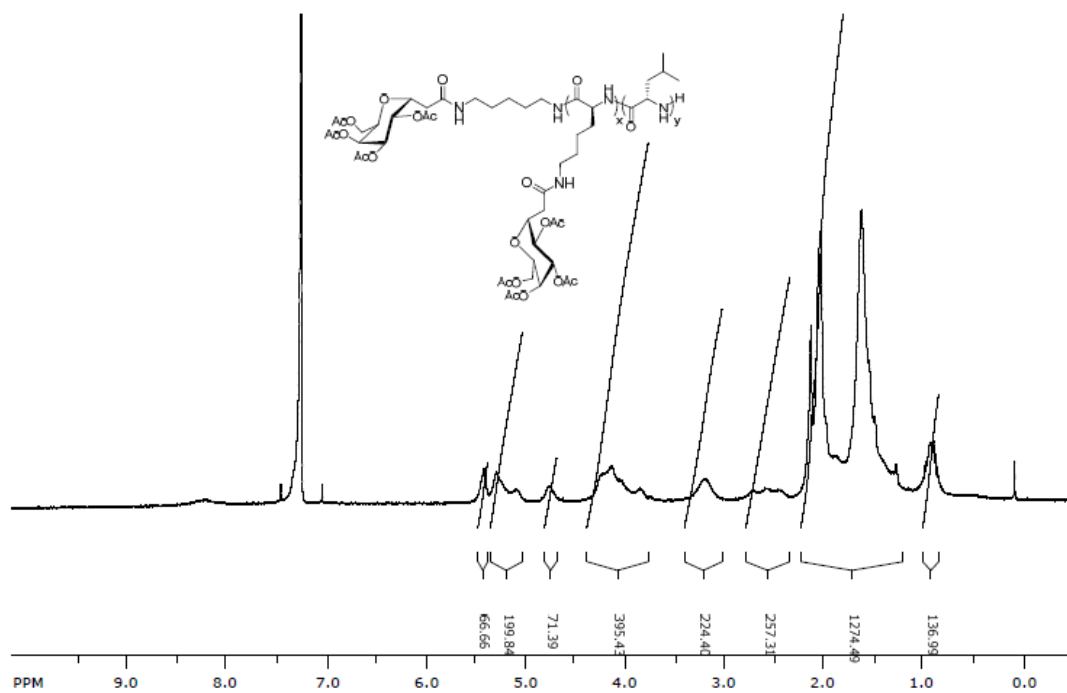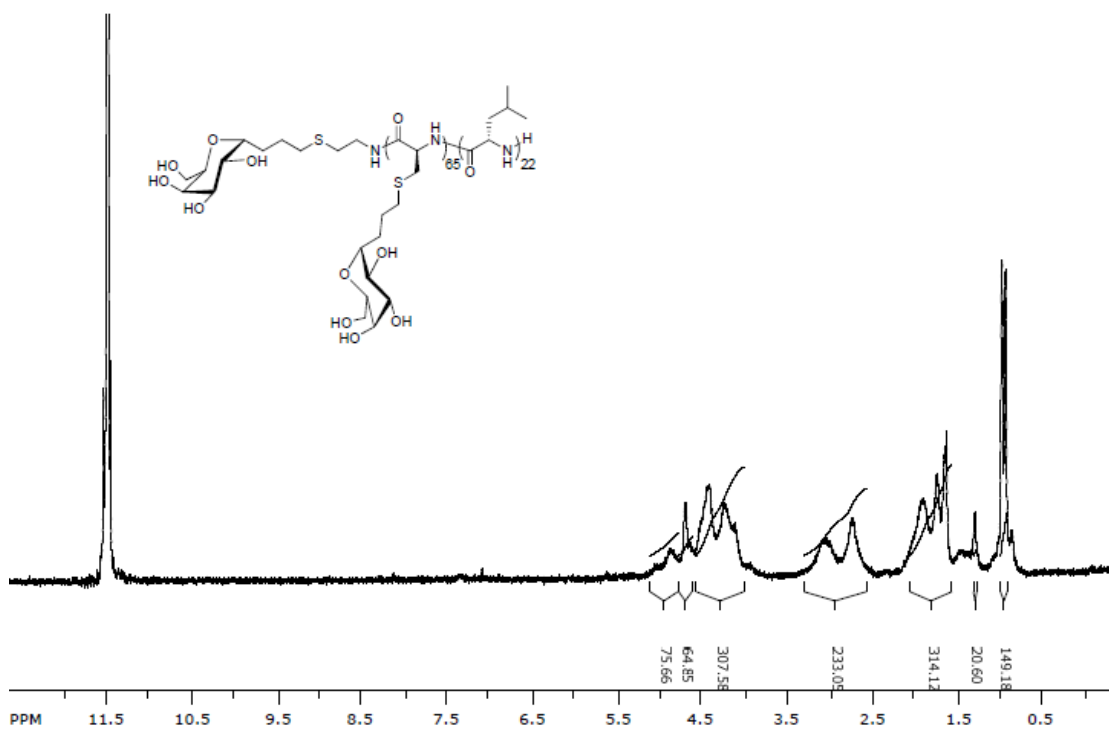

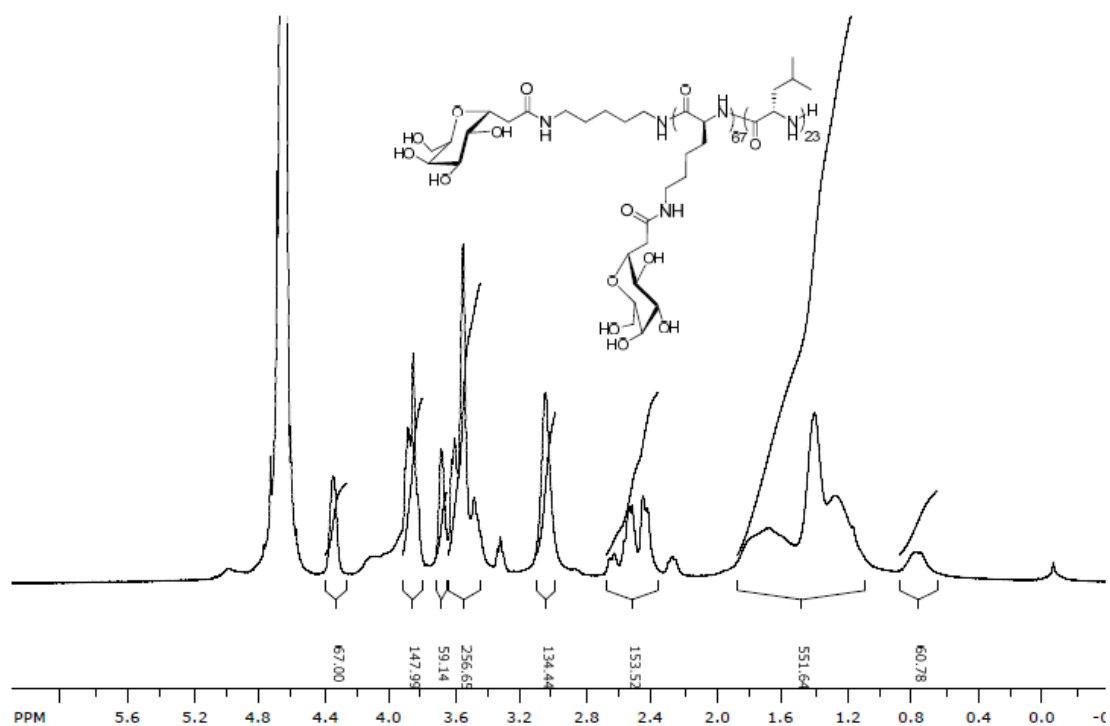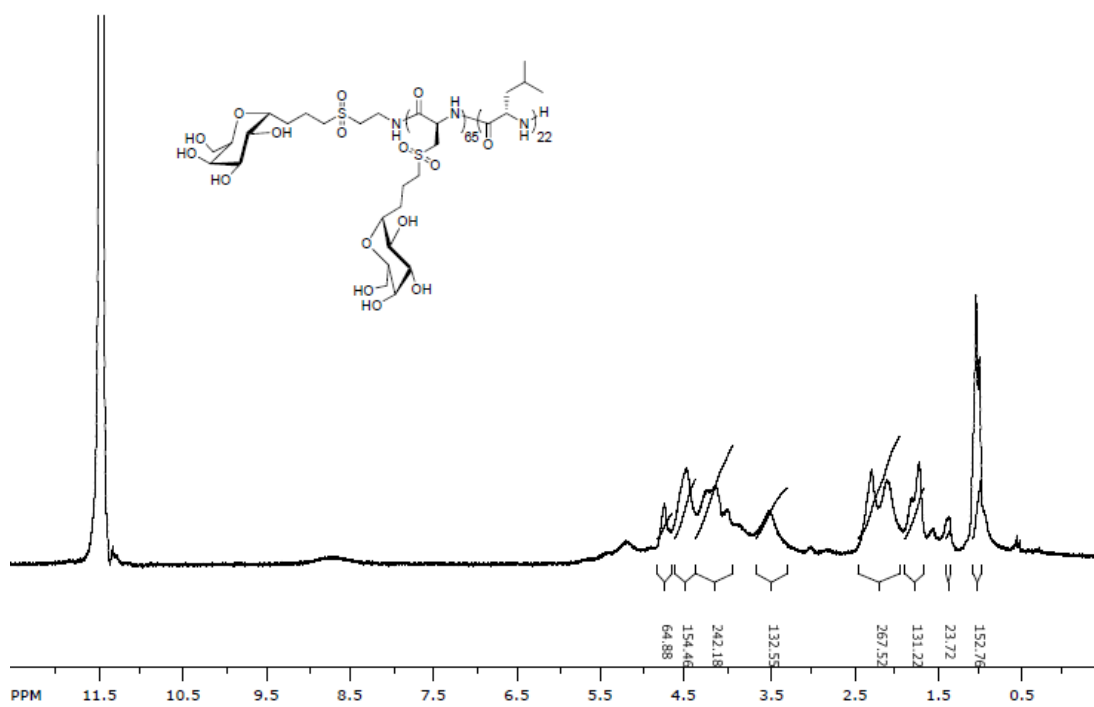

Supplement: c3sm27559k.pdf [file c3sm27559k.pdf]
